# Supplementary material for: Identifying Critical State of Complex Diseases by Single-Sample-Based Hidden Markov Model
Source: Front Genet. 2019 Apr 4;10:285. doi: 10.3389/fgene.2019.00285 (PMC6458292; doi:10.3389/fgene.2019.00285)
Supplement: Supplementary file 1 [file Table_1.xlsx]

## Sheet: Table S1
Table S1: Gene analysis for STAD
Gene	Description	Location	Family	Drugs
COQ6	coenzyme Q6, monooxygenase	Cytoplasm	enzyme
BLNK	B cell linker	Cytoplasm	other
HNRNPC	heterogeneous nuclear ribonucleoprotein C (C1/C2)	Nucleus	other
SERPINA3	serpin family A member 3	Extracellular Space	other
CD52	CD52 molecule	Plasma Membrane	other	alemtuzumab, alemtuzumab/cyclosporin A, alemtuzumab/cyclophosphamide/fludarabine phosphate/rituximab, alemtuzumab/fludarabine phosphate, alemtuzumab/rituximab, alemtuzumab/cyclophosphamide/fludarabine phosphate/mitoxantrone, alemtuzumab/pentostatin, alemtuzumab/bendamustine, alemtuzumab/cyclophosphamide/fludarabine phosphate
COL11A1	collagen type XI alpha 1 chain	Extracellular Space	other	collagenase clostridium histolyticum
ESRRB	estrogen related receptor beta	Nucleus	ligand-dependent nuclear receptor
MEGF11	multiple EGF like domains 11	Other	other
MMP1	matrix metallopeptidase 1	Extracellular Space	peptidase	rebimastat, marimastat
PDF	peptide deformylase, mitochondrial	Cytoplasm	enzyme
SMPDL3B	sphingomyelin phosphodiesterase acid like 3B	Extracellular Space	enzyme
CAPN15	calpain 15	Other	peptidase
C14orf119	chromosome 14 open reading frame 119	Other	other
CSNK2A2	casein kinase 2 alpha 2	Cytoplasm	kinase
EVPLL	envoplakin like	Other	other
LIN9	lin-9 DREAM MuvB core complex component	Nucleus	other
PHF21A	PHD finger protein 21A	Nucleus	enzyme
PIK3AP1	phosphoinositide-3-kinase adaptor protein 1	Cytoplasm	kinase
PTGER3	prostaglandin E receptor 3	Plasma Membrane	G-protein coupled receptor	misoprostol, prostaglandin E2, prostaglandin E1, diclofenac/misoprostol, bimatoprost
SIAH3	siah E3 ubiquitin protein ligase family member 3	Cytoplasm	other
TADA2A	transcriptional adaptor 2A	Nucleus	transcription regulator
ACTC1	actin, alpha, cardiac muscle 1	Cytoplasm	enzyme
AKR1C4	aldo-keto reductase family 1 member C4	Cytoplasm	enzyme
ANAPC11	anaphase promoting complex subunit 11	Cytoplasm	enzyme
AP4B1	adaptor related protein complex 4 subunit beta 1	Cytoplasm	other
ATAD3A	ATPase family, AAA domain containing 3A	Cytoplasm	other
ATP6V0A2	ATPase H+ transporting V0 subunit a2	Cytoplasm	transporter
BICD1	BICD cargo adaptor 1	Cytoplasm	other
C1orf131	chromosome 1 open reading frame 131	Nucleus	other
CDRT4	CMT1A duplicated region transcript 4	Other	other
CHD2	chromodomain helicase DNA binding protein 2	Nucleus	enzyme
DDX20	DEAD-box helicase 20	Nucleus	transcription regulator
DNAJB12	DnaJ heat shock protein family (Hsp40) member B12	Cytoplasm	other
EDARADD	EDAR associated death domain	Cytoplasm	other
ERO1B	endoplasmic reticulum oxidoreductase 1 beta	Cytoplasm	enzyme
EXOSC8	exosome component 8	Nucleus	enzyme
GNRHR2	gonadotropin releasing hormone receptor 2 (pseudogene)	Plasma Membrane	other
NFAT5	nuclear factor of activated T cells 5	Nucleus	transcription regulator
RRN3P2	RRN3 homolog, RNA polymerase I transcription factor pseudogene 2	Other	other
SLC12A3	solute carrier family 12 member 3	Plasma Membrane	transporter	deserpidine/methyclothiazide, amlodipine/hydrochlorothiazide/valsartan, amlodipine/hydrochlorothiazide/olmesartan medoxomil, aliskiren/amlodipine/hydrochlorothiazide, aliskiren/hydrochlorothiazide, hydrochlorothiazide/lisinopril, hydrochlorothiazide/losartan, hydrochlorothiazide/valsartan, hydrochlorothiazide/triamterene, bisoprolol/hydrochlorothiazide, indapamide, hydrochlorothiazide, trichlorom…
SLFN14	schlafen family member 14	Nucleus	enzyme
SNORD15A	small nucleolar RNA, C/D box 15A	Other	other
SPATA7	spermatogenesis associated 7	Cytoplasm	other
SPNS2	sphingolipid transporter 2	Other	transporter
STX5	syntaxin 5	Cytoplasm	transporter
WDR11	WD repeat domain 11	Cytoplasm	other
ZBTB41	zinc finger and BTB domain containing 41	Other	other
ABAT	4-aminobutyrate aminotransferase	Cytoplasm	enzyme	valproic acid, vigabatrin
AKR1E2	aldo-keto reductase family 1 member E2	Cytoplasm	enzyme
ARID2	AT-rich interaction domain 2	Nucleus	transcription regulator
ARL1	ADP ribosylation factor like GTPase 1	Cytoplasm	enzyme
ASGR2	asialoglycoprotein receptor 2	Plasma Membrane	transmembrane receptor
ATXN7L3B	ataxin 7 like 3B	Cytoplasm	other
AXIN1	axin 1	Cytoplasm	other
BUB3	BUB3, mitotic checkpoint protein	Nucleus	other
HEXA-AS1	HEXA antisense RNA 1	Other	other
CARS2	cysteinyl-tRNA synthetase 2, mitochondrial	Cytoplasm	enzyme
CCNK	cyclin K	Nucleus	kinase
CES2	carboxylesterase 2	Cytoplasm	enzyme
CKMT1A/CKMT1B	creatine kinase, mitochondrial 1B	Cytoplasm	kinase
COL16A1	collagen type XVI alpha 1 chain	Extracellular Space	other	collagenase clostridium histolyticum
CXCR5	C-X-C motif chemokine receptor 5	Plasma Membrane	G-protein coupled receptor
DDX6	DEAD-box helicase 6	Nucleus	enzyme
DEDD	death effector domain containing	Nucleus	other
DHRS2	dehydrogenase/reductase 2	Nucleus	enzyme
DHRS4L2	dehydrogenase/reductase 4 like 2	Other	other
DPT	dermatopontin	Extracellular Space	other
EIF3F	eukaryotic translation initiation factor 3 subunit F	Cytoplasm	translation regulator
ELMO3	engulfment and cell motility 3	Cytoplasm	other
ERBB2	erb-b2 receptor tyrosine kinase 2	Plasma Membrane	kinase	trastuzumab, BMS-599626, varlitinib, tesevatinib, CP-724,714, BMS-690514, dacomitinib, afatinib, pertuzumab, ertumaxomab, MP 412, sapitinib, mubritinib, trastuzumab emtansine, CUDC 101, lapatinib/pazopanib, JNJ-26483327, lapatinib/letrozole, cyclophosphamide/docetaxel/doxorubicin/trastuzumab, cyclophosphamide/doxorubicin/paclitaxel/trastuzumab, paclitaxel/trastuzumab, capecitabine/lapatinib, doce…
FAM169B	family with sequence similarity 169 member B	Other	other
FRY	FRY microtubule binding protein	Extracellular Space	other
FTH1	ferritin heavy chain 1	Cytoplasm	enzyme
GDF3	growth differentiation factor 3	Extracellular Space	growth factor
HIST2H2AB	histone cluster 2 H2A family member b	Nucleus	other
IVNS1ABP	influenza virus NS1A binding protein	Nucleus	other
KCNE3	potassium voltage-gated channel subfamily E regulatory subunit 3	Plasma Membrane	ion channel
KCNJ11	potassium voltage-gated channel subfamily J member 11	Plasma Membrane	ion channel	minoxidil, glimepiride/rosiglitazone, glimepiride/pioglitazone, tolbutamide, glipizide, glyburide, tolazamide, acetohexamide, chlorpropamide, glimepiride, thiamylal, repaglinide, phentolamine, nateglinide
C2CD5	C2 calcium dependent domain containing 5	Cytoplasm	other
KIF2C	kinesin family member 2C	Nucleus	other
KLHDC2	kelch domain containing 2	Cytoplasm	other
LPAR5	lysophosphatidic acid receptor 5	Plasma Membrane	G-protein coupled receptor
MACF1	microtubule-actin crosslinking factor 1	Cytoplasm	enzyme
MAD2L2	mitotic arrest deficient 2 like 2	Nucleus	enzyme
MEX3A	mex-3 RNA binding family member A	Cytoplasm	other
MFSD11	major facilitator superfamily domain containing 11	Other	other
NEK3	NIMA related kinase 3	Nucleus	kinase
PACS1	phosphofurin acidic cluster sorting protein 1	Cytoplasm	other
PEA15	proliferation and apoptosis adaptor protein 15	Cytoplasm	transporter
PRKCZ	protein kinase C zeta	Cytoplasm	kinase	pkc-zeta inhibitor, ingenol mebutate
PSMD13	proteasome 26S subunit, non-ATPase 13	Cytoplasm	peptidase
PTP4A2	protein tyrosine phosphatase type IVA, member 2	Cytoplasm	phosphatase
RASA3	RAS p21 protein activator 3	Plasma Membrane	ion channel
RFX7	regulatory factor X7	Other	other
RGMA	repulsive guidance molecule BMP co-receptor a	Plasma Membrane	other
RGS10	regulator of G protein signaling 10	Cytoplasm	other
RNF186	ring finger protein 186	Cytoplasm	enzyme
RPS13	ribosomal protein S13	Cytoplasm	other
RXRG	retinoid X receptor gamma	Nucleus	ligand-dependent nuclear receptor	etretinate, cytarabine/daunorubicin/tretinoin, idarubicin/mitoxantrone/tretinoin, arsenic trioxide/tretinoin, arsenic trioxide/daunorubicin/tretinoin, arsenic trioxide/gemtuzumab ozogamicin/tretinoin, daunorubicin/tretinoin, idarubicin/tretinoin, doxorubicin/tretinoin, arsenic trioxide/idarubicin/tretinoin, 6-mercaptopurine/methotrexate/tretinoin, bexarotene, adapalene, cytarabine/daunorubicin/ge…
SAMD11	sterile alpha motif domain containing 11	Nucleus	other
SBK1	SH3 domain binding kinase 1	Other	kinase
SLAMF9	SLAM family member 9	Extracellular Space	other
SMARCE1	SWI/SNF related, matrix associated, actin dependent regulator of chromatin, subfamily e, member 1	Nucleus	transcription regulator
SNORD9	small nucleolar RNA, C/D box 9	Other	other
SNRNP40	small nuclear ribonucleoprotein U5 subunit 40	Nucleus	other
SPTSSA	serine palmitoyltransferase small subunit A	Cytoplasm	enzyme
SV2A	synaptic vesicle glycoprotein 2A	Cytoplasm	transporter	levetiracetam
SYT16	synaptotagmin 16	Other	transporter
TBX10	T-box 10	Nucleus	transcription regulator
TNFSF4	TNF superfamily member 4	Extracellular Space	cytokine
TRAPPC2L	trafficking protein particle complex 2 like	Cytoplasm	other
TXNIP	thioredoxin interacting protein	Cytoplasm	other
UTP18	UTP18, small subunit processome component	Nucleus	other
VAT1	vesicle amine transport 1	Plasma Membrane	transporter
ZBTB25	zinc finger and BTB domain containing 25	Nucleus	transcription regulator
ZNF469	zinc finger protein 469	Nucleus	transcription regulator
ACP6	acid phosphatase 6, lysophosphatidic	Cytoplasm	phosphatase
ADCY6	adenylate cyclase 6	Plasma Membrane	enzyme
AFG3L1P	AFG3 like matrix AAA peptidase subunit 1, pseudogene	Cytoplasm	other
AGMAT	agmatinase	Cytoplasm	enzyme
ALKBH1	alkB homolog 1, histone H2A dioxygenase	Cytoplasm	enzyme
ALYREF	Aly/REF export factor	Nucleus	transcription regulator
AMN	amnion associated transmembrane protein	Plasma Membrane	other
ANGPTL7	angiopoietin like 7	Extracellular Space	other
ANK3	ankyrin 3	Plasma Membrane	other
AQR	aquarius intron-binding spliceosomal factor	Nucleus	other
ARFIP2	ADP ribosylation factor interacting protein 2	Cytoplasm	other
ART5	ADP-ribosyltransferase 5	Extracellular Space	enzyme
ASB9P1	ankyrin repeat and SOCS box containing 9 pseudogene 1	Other	other
ATOH7	atonal bHLH transcription factor 7	Other	other
ATP5F1B	ATP synthase F1 subunit beta	Cytoplasm	transporter
C12orf45	chromosome 12 open reading frame 45	Other	other
C15orf56	chromosome 15 open reading frame 56	Other	other
SMIM5	small integral membrane protein 5	Other	other
C17orf47	chromosome 17 open reading frame 47	Other	other
C1orf229	chromosome 1 open reading frame 229	Other	other
CCDC169-SOHLH2	CCDC169-SOHLH2 readthrough	Other	transcription regulator
CCDC30	coiled-coil domain containing 30	Cytoplasm	other
CCDC59	coiled-coil domain containing 59	Nucleus	other
CD1A	CD1a molecule	Plasma Membrane	other
CD300A	CD300a molecule	Plasma Membrane	transmembrane receptor
CD6	CD6 molecule	Plasma Membrane	transmembrane receptor
CHKA	choline kinase alpha	Cytoplasm	kinase	TCD-717
CHRDL2	chordin like 2	Cytoplasm	other
CLDN19	claudin 19	Plasma Membrane	other
CLPB	ClpB homolog, mitochondrial AAA ATPase chaperonin	Nucleus	transcription regulator
DCDC2B	doublecortin domain containing 2B	Other	other
DHRS4-AS1	DHRS4 antisense RNA 1	Other	other
DIABLO	diablo IAP-binding mitochondrial protein	Cytoplasm	other
DLGAP3	DLG associated protein 3	Cytoplasm	other
DUSP10	dual specificity phosphatase 10	Nucleus	phosphatase
DYRK3	dual specificity tyrosine phosphorylation regulated kinase 3	Nucleus	kinase
ETV3	ETS variant 3	Nucleus	transcription regulator
F11R	F11 receptor	Plasma Membrane	other
FAM106A	family with sequence similarity 106 member A	Other	other
FBXL16	F-box and leucine rich repeat protein 16	Cytoplasm	enzyme
FECH	ferrochelatase	Cytoplasm	enzyme
FRA10AC1	FRA10A associated CGG repeat 1	Nucleus	other
FUT4	fucosyltransferase 4	Cytoplasm	enzyme
GNB1	G protein subunit beta 1	Plasma Membrane	enzyme
GPR135	G protein-coupled receptor 135	Plasma Membrane	G-protein coupled receptor
GREB1L	GREB1 like retinoic acid receptor coactivator	Extracellular Space	other
GRIN2A	glutamate ionotropic receptor NMDA type subunit 2A	Plasma Membrane	ion channel	dextromethorphan/morphine, neramexane, bicifadine, delucemine, nebostinel, besonprodil, UK-240455, tenocyclidine, dextromethorphan/quinidine, donepezil/memantine, ketamine, felbamate, memantine, orphenadrine, cycloserine, N-(2-indanyl)glycinamide, dextromethorphan, brompheniramine/dextromethorphan/pseudoephedrine, chlorpheniramine/dextromethorphan/phenylephrine, carbinoxamine/dextromethorphan/pse…
HCRT	hypocretin neuropeptide precursor	Extracellular Space	other	lemborexant
MROH7	maestro heat like repeat family member 7	Extracellular Space	other
HEXDC	hexosaminidase D	Other	enzyme
JPT1	Jupiter microtubule associated homolog 1	Nucleus	other
HRH4	histamine receptor H4	Plasma Membrane	G-protein coupled receptor	tesmilifene, triprolidine, buclizine
IFITM10	interferon induced transmembrane protein 10	Other	other
IGF1	insulin like growth factor 1	Extracellular Space	growth factor	MEDI-573, BI 836845
IQCC	IQ motif containing C	Other	other
KCNA3	potassium voltage-gated channel subfamily A member 3	Plasma Membrane	ion channel	dalfampridine
KCNJ2-AS1	KCNJ2 antisense RNA 1	Other	other
KIAA2013	KIAA2013	Other	other
KIF19	kinesin family member 19	Extracellular Space	enzyme
KLHDC9	kelch domain containing 9	Other	other
KSR2	kinase suppressor of ras 2	Cytoplasm	kinase
LRFN5	leucine rich repeat and fibronectin type III domain containing 5	Nucleus	other
LRRC37A3 (includes others)	leucine rich repeat containing 37 member A3	Other	other
LRRIQ3	leucine rich repeats and IQ motif containing 3	Other	other
LYRM1	LYR motif containing 1	Cytoplasm	other
MAP3K12	mitogen-activated protein kinase kinase kinase 12	Cytoplasm	kinase
MECR	mitochondrial trans-2-enoyl-CoA reductase	Cytoplasm	enzyme
MED9	mediator complex subunit 9	Nucleus	other
MFGE8	milk fat globule-EGF factor 8 protein	Extracellular Space	other
MINK1	misshapen like kinase 1	Cytoplasm	kinase
MPEG1	macrophage expressed 1	Cytoplasm	other	CFI-402257
MRPL20	mitochondrial ribosomal protein L20	Cytoplasm	other
MRPL46	mitochondrial ribosomal protein L46	Cytoplasm	other
MUC6	mucin 6, oligomeric mucus/gel-forming	Extracellular Space	other
NACA	nascent polypeptide associated complex subunit alpha	Cytoplasm	transcription regulator
NCAPD3	non-SMC condensin II complex subunit D3	Nucleus	other
NDUFA4L2	NDUFA4, mitochondrial complex associated like 2	Other	enzyme
NECAP1	NECAP endocytosis associated 1	Plasma Membrane	other
NES	nestin	Extracellular Space	other
NTM	neurotrimin	Plasma Membrane	other
NUDT15	nudix hydrolase 15	Cytoplasm	phosphatase
NABP2	nucleic acid binding protein 2	Nucleus	other
ORC6	origin recognition complex subunit 6	Nucleus	other
P2RX7	purinergic receptor P2X 7	Plasma Membrane	ion channel
PADI4	peptidyl arginine deiminase 4	Cytoplasm	enzyme
PCBD1	pterin-4 alpha-carbinolamine dehydratase 1	Nucleus	transcription regulator
PDPN	podoplanin	Plasma Membrane	other
PIGH	phosphatidylinositol glycan anchor biosynthesis class H	Cytoplasm	enzyme
PLBD1	phospholipase B domain containing 1	Extracellular Space	enzyme
POLR2G	RNA polymerase II subunit G	Nucleus	enzyme
PRB3	proline rich protein BstNI subfamily 3	Other	other
PRSS33	serine protease 33	Extracellular Space	peptidase
PSME1	proteasome activator subunit 1	Cytoplasm	other
PTBP2	polypyrimidine tract binding protein 2	Nucleus	other
PTGR2	prostaglandin reductase 2	Cytoplasm	enzyme	glycyrrhetinic acid
RASSF5	Ras association domain family member 5	Plasma Membrane	other
RERG	RAS like estrogen regulated growth inhibitor	Nucleus	enzyme
RFX5	regulatory factor X5	Nucleus	transcription regulator
RHBDF1	rhomboid 5 homolog 1	Cytoplasm	other
RHOG	ras homolog family member G	Cytoplasm	enzyme
RHOT2	ras homolog family member T2	Cytoplasm	enzyme
RPL31P11	ribosomal protein L31 pseudogene 11	Other	other
SEPHS2	selenophosphate synthetase 2	Cytoplasm	enzyme
SHBG	sex hormone binding globulin	Extracellular Space	other
SNRPE	small nuclear ribonucleoprotein polypeptide E	Nucleus	other
STAT3	signal transducer and activator of transcription 3	Nucleus	transcription regulator	golotimod, OPB-31121, OPB-51602, STAT3 inhibitor XIII, danvatirsen
STK24	serine/threonine kinase 24	Cytoplasm	kinase	bosutinib
SYT17	synaptotagmin 17	Plasma Membrane	other
TAF3	TATA-box binding protein associated factor 3	Nucleus	transcription regulator
TAS2R20	taste 2 receptor member 20	Plasma Membrane	G-protein coupled receptor
TBC1D10B	TBC1 domain family member 10B	Plasma Membrane	enzyme
TBCEL	tubulin folding cofactor E like	Other	other
THAP10	THAP domain containing 10	Other	other
TMC8	transmembrane channel like 8	Cytoplasm	other
TMEM98	transmembrane protein 98	Cytoplasm	other
TNFRSF19	TNF receptor superfamily member 19	Plasma Membrane	transmembrane receptor
TSPAN14	tetraspanin 14	Plasma Membrane	other
URB2	URB2 ribosome biogenesis 2 homolog (S. cerevisiae)	Nucleus	other
VPS29	VPS29, retromer complex component	Cytoplasm	transporter
VWCE	von Willebrand factor C and EGF domains	Cytoplasm	other
WFIKKN1	WAP, follistatin/kazal, immunoglobulin, kunitz and netrin domain containing 1	Cytoplasm	other
XPNPEP1	X-prolyl aminopeptidase 1	Cytoplasm	peptidase
XYLT1	xylosyltransferase 1	Cytoplasm	enzyme
ZBED5	zinc finger BED-type containing 5	Nucleus	transcription regulator
ZFP36L1	ZFP36 ring finger protein like 1	Nucleus	transcription regulator
ZFP69B	ZFP69 zinc finger protein B	Nucleus	transcription regulator
ABCC6P1	ATP binding cassette subfamily C member 6 pseudogene 1	Other	other
ABCD4	ATP binding cassette subfamily D member 4	Cytoplasm	transporter
ACACB	acetyl-CoA carboxylase beta	Cytoplasm	enzyme
ACAN	aggrecan	Extracellular Space	other
ACOX1	acyl-CoA oxidase 1	Cytoplasm	enzyme
ADAMTS18	ADAM metallopeptidase with thrombospondin type 1 motif 18	Extracellular Space	peptidase
ADCY9	adenylate cyclase 9	Plasma Membrane	enzyme
ADIPOR1	adiponectin receptor 1	Plasma Membrane	transmembrane receptor
ADIPOR2	adiponectin receptor 2	Plasma Membrane	transmembrane receptor
ALG14	ALG14, UDP-N-acetylglucosaminyltransferase subunit	Cytoplasm	enzyme
AMBRA1	autophagy and beclin 1 regulator 1	Cytoplasm	other
APAF1	apoptotic peptidase activating factor 1	Cytoplasm	other
ARAP1	ArfGAP with RhoGAP domain, ankyrin repeat and PH domain 1	Cytoplasm	other
ARNT	aryl hydrocarbon receptor nuclear translocator	Nucleus	transcription regulator
ARSG	arylsulfatase G	Cytoplasm	enzyme
AS3MT	arsenite methyltransferase	Cytoplasm	enzyme
ATAD3B	ATPase family, AAA domain containing 3B	Nucleus	other
ATAD3C	ATPase family, AAA domain containing 3C	Cytoplasm	other
ATP1A1	ATPase Na+/K+ transporting subunit alpha 1	Plasma Membrane	transporter	digoxin, acetyldigitoxin derivative, trichloromethiazide, ciclopirox olamine, ethacrynic acid, reserpine/trichloromethiazide, bretylium, perphenazine, ouabain, digitoxin
ATP5F1C	ATP synthase F1 subunit gamma	Cytoplasm	transporter
AURKAP1	aurora kinase A pseudogene 1	Other	other
B3GAT3	beta-1,3-glucuronyltransferase 3	Cytoplasm	enzyme
BCAS3	BCAS3, microtubule associated cell migration factor	Nucleus	other
BRD7	bromodomain containing 7	Nucleus	transcription regulator
CAP1	cyclase associated actin cytoskeleton regulatory protein 1	Plasma Membrane	other
CASP1	caspase 1	Cytoplasm	peptidase	caspase 1 inhibitor
DRC7	dynein regulatory complex subunit 7	Cytoplasm	other
SVBP	small vasohibin binding protein	Other	other
CCDC84	coiled-coil domain containing 84	Other	other
CCNT1	cyclin T1	Nucleus	transcription regulator
CD244	CD244 molecule	Plasma Membrane	transmembrane receptor
CD27	CD27 molecule	Plasma Membrane	transmembrane receptor	CDX-1127
CDC42SE1	CDC42 small effector 1	Plasma Membrane	other
CDK18	cyclin dependent kinase 18	Cytoplasm	kinase
CDK3	cyclin dependent kinase 3	Other	kinase	alvocidib
COL8A2	collagen type VIII alpha 2 chain	Extracellular Space	other	collagenase clostridium histolyticum
CPNE8	copine 8	Cytoplasm	other
INTS11	integrator complex subunit 11	Nucleus	other
CUBN	cubilin	Plasma Membrane	transmembrane receptor
CYP2J2	cytochrome P450 family 2 subfamily J member 2	Cytoplasm	enzyme
DAD1	defender against cell death 1	Cytoplasm	other
DAP3	death associated protein 3	Cytoplasm	other
DDX21	DExD-box helicase 21	Nucleus	enzyme
DDX5	DEAD-box helicase 5	Nucleus	enzyme
DKK3	dickkopf WNT signaling pathway inhibitor 3	Extracellular Space	cytokine
DNASE1	deoxyribonuclease 1	Extracellular Space	enzyme
DPYSL4	dihydropyrimidinase like 4	Cytoplasm	enzyme
DYNLL2	dynein light chain LC8-type 2	Cytoplasm	other
EFCAB11	EF-hand calcium binding domain 11	Other	other
EGLN1	egl-9 family hypoxia inducible factor 1	Cytoplasm	enzyme
ELL3	elongation factor for RNA polymerase II 3	Nucleus	transcription regulator
EMP1	epithelial membrane protein 1	Plasma Membrane	other
ERAL1	Era like 12S mitochondrial rRNA chaperone 1	Cytoplasm	other
ERGIC2	ERGIC and golgi 2	Cytoplasm	other
ERI2	ERI1 exoribonuclease family member 2	Other	other
F5	coagulation factor V	Extracellular Space	other	drotrecogin alfa, antithrombin alfa
ABHD17C	abhydrolase domain containing 17C	Plasma Membrane	enzyme
FAM110D	family with sequence similarity 110 member D	Other	other
FAM35DP	family with sequence similarity 35, member A pseudogene	Other	other
FASN	fatty acid synthase	Cytoplasm	enzyme	TVB-2640, orlistat, cerulenin, 3-V bioscience-2640
FBXO44	F-box protein 44	Cytoplasm	enzyme
FCRL4	Fc receptor like 4	Cytoplasm	other
FHAD1	forkhead associated phosphopeptide binding domain 1	Other	other
FHL3	four and a half LIM domains 3	Plasma Membrane	other
FRAT2	FRAT2, WNT signaling pathway regulator	Cytoplasm	other
G6PC3	glucose-6-phosphatase catalytic subunit 3	Cytoplasm	phosphatase
GALE	UDP-galactose-4-epimerase	Cytoplasm	enzyme
GALK2	galactokinase 2	Cytoplasm	kinase
GGNBP2	gametogenetin binding protein 2	Other	other
GPR89A/GPR89B	G protein-coupled receptor 89B	Cytoplasm	ion channel
GSTP1	glutathione S-transferase pi 1	Cytoplasm	enzyme
HAGH	hydroxyacylglutathione hydrolase	Cytoplasm	enzyme
HAL	histidine ammonia-lyase	Cytoplasm	enzyme
HENMT1	HEN methyltransferase 1	Other	enzyme
HEPACAM	hepatic and glial cell adhesion molecule	Plasma Membrane	other
HERPUD1	homocysteine inducible ER protein with ubiquitin like domain 1	Cytoplasm	other
MFSD14A	major facilitator superfamily domain containing 14A	Other	transporter
HOMEZ	homeobox and leucine zipper encoding	Nucleus	transcription regulator
HOXB7	homeobox B7	Nucleus	transcription regulator
HPS5	HPS5, biogenesis of lysosomal organelles complex 2 subunit 2	Cytoplasm	other
IFFO1	intermediate filament family orphan 1	Other	other
INO80E	INO80 complex subunit E	Nucleus	other
IRF9	interferon regulatory factor 9	Nucleus	transcription regulator
ITGB7	integrin subunit beta 7	Plasma Membrane	transmembrane receptor	vedolizumab
JPH4	junctophilin 4	Cytoplasm	other
KCNC1	potassium voltage-gated channel subfamily C member 1	Plasma Membrane	ion channel	dalfampridine
KCNMB4	potassium calcium-activated channel subfamily M regulatory beta subunit 4	Plasma Membrane	ion channel	tedisamil
KCTD10	potassium channel tetramerization domain containing 10	Nucleus	ion channel
KL	klotho	Extracellular Space	enzyme
KLF17	Kruppel like factor 17	Nucleus	transcription regulator
KLHL20	kelch like family member 20	Plasma Membrane	enzyme
KRT13	keratin 13	Cytoplasm	other
KRT80	keratin 80	Cytoplasm	other
LGALS9C	galectin 9C	Cytoplasm	other
SYNE3	spectrin repeat containing nuclear envelope family member 3	Nucleus	other
LRRC32	leucine rich repeat containing 32	Plasma Membrane	other
LRRC8B	leucine rich repeat containing 8 VRAC subunit B	Plasma Membrane	transporter
LSM10	LSM10, U7 small nuclear RNA associated	Nucleus	other
MARK3	microtubule affinity regulating kinase 3	Cytoplasm	kinase	cdc25C phosphatase (211-221)
MCTP2	multiple C2 and transmembrane domain containing 2	Other	other
MESP1	mesoderm posterior bHLH transcription factor 1	Nucleus	transcription regulator
MGRN1	mahogunin ring finger 1	Cytoplasm	enzyme
mir-1228	microRNA 1228	Cytoplasm	microRNA
mir-1260b	microRNA 1260b	Cytoplasm	microRNA
mir-214	microRNA 214	Cytoplasm	microRNA
MIR3916	microRNA 3916	Cytoplasm	microRNA
mir-762	microRNA 762	Cytoplasm	microRNA
mir-936	microRNA 936	Cytoplasm	microRNA
MRPL17	mitochondrial ribosomal protein L17	Cytoplasm	other
MRPL37	mitochondrial ribosomal protein L37	Cytoplasm	enzyme
MS4A7	membrane spanning 4-domains A7	Other	other
MTFMT	mitochondrial methionyl-tRNA formyltransferase	Cytoplasm	enzyme
MUC2	mucin 2, oligomeric mucus/gel-forming	Extracellular Space	other
MXRA8	matrix remodeling associated 8	Cytoplasm	other
MYO1C	myosin IC	Cytoplasm	enzyme
NAA25	N(alpha)-acetyltransferase 25, NatB auxiliary subunit	Cytoplasm	other
NADSYN1	NAD synthetase 1	Cytoplasm	enzyme
CIAO3	cytosolic iron-sulfur assembly component 3	Cytoplasm	other
NARS2	asparaginyl-tRNA synthetase 2, mitochondrial	Cytoplasm	enzyme
NSMCE3	NSE3 homolog, SMC5-SMC6 complex component	Nucleus	other
NFIA	nuclear factor I A	Nucleus	transcription regulator
NOG	noggin	Extracellular Space	growth factor
NRAS	NRAS proto-oncogene, GTPase	Plasma Membrane	enzyme
NUDT4	nudix hydrolase 4	Cytoplasm	phosphatase
NUFIP1	NUFIP1, FMR1 interacting protein 1	Nucleus	other
OVCA2	OVCA2, serine hydrolase domain containing	Cytoplasm	other
PACS2	phosphofurin acidic cluster sorting protein 2	Cytoplasm	other
PAFAH1B1	platelet activating factor acetylhydrolase 1b regulatory subunit 1	Cytoplasm	enzyme
PAN3	poly(A) specific ribonuclease subunit PAN3	Cytoplasm	other
PAOX	polyamine oxidase	Cytoplasm	enzyme
PDC	phosducin	Cytoplasm	other
PDE4B	phosphodiesterase 4B	Cytoplasm	enzyme	enprofylline, dyphylline, nitroglycerin, caffeine/ergotamine, arofylline, tetomilast, L 869298, ibudilast, apremilast, anagrelide, cilomilast, milrinone, dipyridamole, L-826,141, ketotifen, roflumilast, tolbutamide, papaverine, theophylline, pentoxifylline, caffeine
PER3	period circadian regulator 3	Nucleus	other
PFKP	phosphofructokinase, platelet	Cytoplasm	kinase
PGAM1	phosphoglycerate mutase 1	Cytoplasm	phosphatase
PIP4K2B	phosphatidylinositol-5-phosphate 4-kinase type 2 beta	Cytoplasm	kinase
PLA2G16	phospholipase A2 group XVI	Nucleus	enzyme
PLA2G4D	phospholipase A2 group IVD	Cytoplasm	enzyme
PPIEL	peptidylprolyl isomerase E like pseudogene	Other	other
PPP1R1A	protein phosphatase 1 regulatory inhibitor subunit 1A	Cytoplasm	phosphatase
PPP1R36	protein phosphatase 1 regulatory subunit 36	Other	other
PRH2	proline rich protein HaeIII subfamily 2	Extracellular Space	other
PSMB3	proteasome subunit beta 3	Cytoplasm	peptidase
PSMB6	proteasome subunit beta 6	Nucleus	peptidase
PSTK	phosphoseryl-tRNA kinase	Cytoplasm	kinase
CAVIN1	caveolae associated protein 1	Nucleus	transcription regulator
QRICH2	glutamine rich 2	Extracellular Space	other
RAP1GAP	RAP1 GTPase activating protein	Cytoplasm	other
RASAL1	RAS protein activator like 1	Cytoplasm	other
RASSF4	Ras association domain family member 4	Other	other
RBP7	retinol binding protein 7	Cytoplasm	other
RCN2	reticulocalbin 2	Cytoplasm	other
RPP30	ribonuclease P/MRP subunit p30	Nucleus	enzyme
RPUSD4	RNA pseudouridylate synthase domain containing 4	Cytoplasm	other
S100PBP	S100P binding protein	Nucleus	other
SALL1	spalt like transcription factor 1	Nucleus	transcription regulator
SCYL1	SCY1 like pseudokinase 1	Cytoplasm	kinase
SDR39U1	short chain dehydrogenase/reductase family 39U member 1	Nucleus	other
SETDB1	SET domain bifurcated 1	Nucleus	enzyme
SLC12A6	solute carrier family 12 member 6	Plasma Membrane	transporter
SLC38A2	solute carrier family 38 member 2	Plasma Membrane	transporter
SLC7A1	solute carrier family 7 member 1	Plasma Membrane	transporter
PPP4R3A	protein phosphatase 4 regulatory subunit 3A	Plasma Membrane	other
SMYD2	SET and MYND domain containing 2	Cytoplasm	enzyme
SNORA31	small nucleolar RNA, H/ACA box 31	Other	other
SPINT1	serine peptidase inhibitor, Kunitz type 1	Extracellular Space	other
SSR2	signal sequence receptor subunit 2	Cytoplasm	other
STAB2	stabilin 2	Plasma Membrane	transmembrane receptor
SV2B	synaptic vesicle glycoprotein 2B	Plasma Membrane	transporter
SYNGR3	synaptogyrin 3	Plasma Membrane	other
TCL1A	T cell leukemia/lymphoma 1A	Nucleus	transcription regulator
TECTA	tectorin alpha	Extracellular Space	enzyme
TEX12	testis expressed 12	Nucleus	other
TIPRL	TOR signaling pathway regulator	Cytoplasm	other
NDC1	NDC1 transmembrane nucleoporin	Nucleus	other
TRAF3	TNF receptor associated factor 3	Cytoplasm	enzyme
TRPC4	transient receptor potential cation channel subfamily C member 4	Plasma Membrane	ion channel
TSC2	TSC complex subunit 2	Cytoplasm	other
TTC39A	tetratricopeptide repeat domain 39A	Other	other
TTC9C	tetratricopeptide repeat domain 9C	Other	other
UBE2G1	ubiquitin conjugating enzyme E2 G1	Cytoplasm	enzyme
UBE2O	ubiquitin conjugating enzyme E2 O	Nucleus	enzyme
UBQLNL	ubiquilin like	Other	other
UBR4	ubiquitin protein ligase E3 component n-recognin 4	Nucleus	enzyme
UBXN11	UBX domain protein 11	Cytoplasm	other
VPS26B	VPS26, retromer complex component B	Cytoplasm	transporter
VTI1B	vesicle transport through interaction with t-SNAREs 1B	Plasma Membrane	transporter
WDTC1	WD and tetratricopeptide repeats 1	Nucleus	other
ZC3H18	zinc finger CCCH-type containing 18	Nucleus	other
ZC3H7A	zinc finger CCCH-type containing 7A	Extracellular Space	other
ZEB1	zinc finger E-box binding homeobox 1	Nucleus	transcription regulator
ZMYM1	zinc finger MYM-type containing 1	Other	other
ZNF232	zinc finger protein 232	Nucleus	transcription regulator
ZNF280D	zinc finger protein 280D	Other	other
ZNF286B	zinc finger protein 286B	Other	other
ZNF326	zinc finger protein 326	Nucleus	transcription regulator
ZNF511	zinc finger protein 511	Nucleus	transcription regulator
ZNF672	zinc finger protein 672	Nucleus	transcription regulator
ZNF687	zinc finger protein 687	Nucleus	transcription regulator
ZNF764	zinc finger protein 764	Other	other
ZSWIM5	zinc finger SWIM-type containing 5	Extracellular Space	other
