# Supplementary material for: Identifying Critical State of Complex Diseases by Single-Sample-Based Hidden Markov Model
Source: Front Genet. 2019 Apr 4;10:285. doi: 10.3389/fgene.2019.00285 (PMC6458292; doi:10.3389/fgene.2019.00285)
Supplement: Supplementary file 2 [file Table_2.xlsx]

## Sheet: Table S2
Table S2: Gene analysis for Flu
Gene	Description	Location	Family	Drugs
ACAT2	acetyl-CoA acetyltransferase 2	Cytoplasm	enzyme
AKR1C1/AKR1C2	aldo-keto reductase family 1 member C2	Cytoplasm	enzyme
ALDH3B1	aldehyde dehydrogenase 3 family member B1	Cytoplasm	enzyme
AMELY	amelogenin Y-linked	Extracellular Space	growth factor
R3HCC1L	R3H domain and coiled-coil containing 1 like	Other	other
CARD10	caspase recruitment domain family member 10	Cytoplasm	other
CREM	cAMP responsive element modulator	Nucleus	transcription regulator
DAZL	deleted in azoospermia like	Cytoplasm	translation regulator
ELP3	elongator acetyltransferase complex subunit 3	Nucleus	enzyme
EML3	echinoderm microtubule associated protein like 3	Other	other
OTULINL	OTU deubiquitinase with linear linkage specificity like	Other	other
GALNT1	polypeptide N-acetylgalactosaminyltransferase 1	Cytoplasm	enzyme
GAS2	growth arrest specific 2	Cytoplasm	other
GCLM	glutamate-cysteine ligase modifier subunit	Cytoplasm	enzyme
ADGRG6	adhesion G protein-coupled receptor G6	Plasma Membrane	G-protein coupled receptor
HADHB	hydroxyacyl-CoA dehydrogenase trifunctional multienzyme complex subunit beta	Cytoplasm	enzyme
INSL5	insulin like 5	Extracellular Space	other
ITGB5	integrin subunit beta 5	Plasma Membrane	other	cilengitide
KDM4C	lysine demethylase 4C	Nucleus	enzyme
KCNQ3	potassium voltage-gated channel subfamily Q member 3	Plasma Membrane	ion channel	ezogabine
KHK	ketohexokinase	Cytoplasm	kinase
PIDD1	p53-induced death domain protein 1	Cytoplasm	other
MRPL48	mitochondrial ribosomal protein L48	Cytoplasm	other
PCDHGA9	protocadherin gamma subfamily A, 9	Other	other
PITX3	paired like homeodomain 3	Nucleus	transcription regulator
PLS3	plastin 3	Cytoplasm	other
PPP2R2B	protein phosphatase 2 regulatory subunit Bbeta	Cytoplasm	phosphatase
PRELP	proline and arginine rich end leucine rich repeat protein	Extracellular Space	other
PTEN	phosphatase and tensin homolog	Cytoplasm	phosphatase
RIC8B	RIC8 guanine nucleotide exchange factor B	Cytoplasm	other
RNASE1	ribonuclease A family member 1, pancreatic	Extracellular Space	enzyme
RRBP1	ribosome binding protein 1	Cytoplasm	other
SERPIND1	serpin family D member 1	Extracellular Space	other	ardeparin, glucuronyl glucosamine glycan sulfate
STS	steroid sulfatase	Cytoplasm	enzyme	coumate, STX64 compound
TSPAN12	tetraspanin 12	Plasma Membrane	other
TUBB4A	tubulin beta 4A class IVa	Cytoplasm	other	epothilone B, colchicine/probenecid, larotaxel, ABT-751, eribulin, simotaxel, davunetide, vintafolide, milataxel, cevipabulin, gemcitabine/paclitaxel, docetaxel/prednisone, capecitabine/docetaxel, paclitaxel/trastuzumab, cyclophosphamide/prednisone/vincristine, docetaxel/hydrocortisone, cyclophosphamide/docetaxel, gemcitabine/vinorelbine, cyclophosphamide/daunorubicin/imatinib/prednisone/vincrist…
USP19	ubiquitin specific peptidase 19	Cytoplasm	peptidase
ZC3HAV1	zinc finger CCCH-type containing, antiviral 1	Plasma Membrane	other
ZNF580	zinc finger protein 580	Nucleus	transcription regulator
ZNF816	zinc finger protein 816	Other	other
AADAC	arylacetamide deacetylase	Cytoplasm	enzyme
AMPD2	adenosine monophosphate deaminase 2	Cytoplasm	enzyme
ANXA13	annexin A13	Plasma Membrane	other
APEX2	apurinic/apyrimidinic endodeoxyribonuclease 2	Nucleus	enzyme
ARVCF	ARVCF, delta catenin family member	Plasma Membrane	other
ASCC3	activating signal cointegrator 1 complex subunit 3	Cytoplasm	enzyme
ELP5	elongator acetyltransferase complex subunit 5	Cytoplasm	other	AZD7624
CARHSP1	calcium regulated heat stable protein 1	Cytoplasm	transcription regulator
CDC37	cell division cycle 37	Cytoplasm	kinase
CDS1	CDP-diacylglycerol synthase 1	Cytoplasm	enzyme
CMKLR1	chemerin chemokine-like receptor 1	Plasma Membrane	G-protein coupled receptor
CNR2	cannabinoid receptor 2	Plasma Membrane	G-protein coupled receptor	trans-(±)-nabilone, BAY 38-7271, delta-9-tetrahydrocannabinol
COL15A1	collagen type XV alpha 1 chain	Extracellular Space	other	collagenase clostridium histolyticum
COX6B1	cytochrome c oxidase subunit 6B1	Cytoplasm	enzyme
COX6C	cytochrome c oxidase subunit 6C	Cytoplasm	enzyme
ECI1	enoyl-CoA delta isomerase 1	Cytoplasm	enzyme
DDX24	DEAD-box helicase 24	Nucleus	enzyme
DNASE2	deoxyribonuclease 2, lysosomal	Cytoplasm	enzyme
DUSP7	dual specificity phosphatase 7	Cytoplasm	phosphatase
ENG	endoglin	Plasma Membrane	transmembrane receptor	TRC105
EPB41L3	erythrocyte membrane protein band 4.1 like 3	Plasma Membrane	other
MECOM	MDS1 and EVI1 complex locus	Nucleus	transcription regulator
EYA2	EYA transcriptional coactivator and phosphatase 2	Nucleus	phosphatase
FARS2	phenylalanyl-tRNA synthetase 2, mitochondrial	Cytoplasm	enzyme
FBL	fibrillarin	Nucleus	enzyme
FGL2	fibrinogen like 2	Extracellular Space	peptidase
FOXO3	forkhead box O3	Nucleus	transcription regulator
GABRR2	gamma-aminobutyric acid type A receptor rho2 subunit	Plasma Membrane	ion channel	nitrazepam, adinazolam, metyrapone/oxazepam, estazolam, quazepam, diazepam, temazepam, triazolam, flurazepam, midazolam, oxazepam, diphenhydramine/midazolam
GNL3L	G protein nucleolar 3 like	Nucleus	other
GPC3	glypican 3	Plasma Membrane	other	ERY974
GPSM2	G protein signaling modulator 2	Nucleus	other
HEY1	hes related family bHLH transcription factor with YRPW motif 1	Nucleus	transcription regulator
HIST1H2AE	histone cluster 1 H2A family member e	Nucleus	other
IL17RB	interleukin 17 receptor B	Plasma Membrane	transmembrane receptor
JAK3	Janus kinase 3	Cytoplasm	kinase	tofacitinib, R-348, methotrexate/tofacitinib, PF-06651600
KCNA2	potassium voltage-gated channel subfamily A member 2	Plasma Membrane	ion channel	dalfampridine
KIFC3	kinesin family member C3	Cytoplasm	enzyme
LHX6	LIM homeobox 6	Nucleus	transcription regulator
LOXL1	lysyl oxidase like 1	Extracellular Space	enzyme
MIA2	MIA SH3 domain ER export factor 2	Cytoplasm	transporter
MTAP	methylthioadenosine phosphorylase	Nucleus	enzyme
MTUS1	microtubule associated scaffold protein 1	Extracellular Space	other
MYO1D	myosin ID	Cytoplasm	enzyme
NUP50	nucleoporin 50	Nucleus	transporter
OAS1	2'-5'-oligoadenylate synthetase 1	Cytoplasm	enzyme
OLR1	oxidized low density lipoprotein receptor 1	Plasma Membrane	transmembrane receptor
OTUD7B	OTU deubiquitinase 7B	Cytoplasm	peptidase
PADI4	peptidyl arginine deiminase 4	Cytoplasm	enzyme
PAFAH1B1	platelet activating factor acetylhydrolase 1b regulatory subunit 1	Cytoplasm	enzyme
PAPOLA	poly(A) polymerase alpha	Nucleus	enzyme
PARL	presenilin associated rhomboid like	Cytoplasm	peptidase
PCDH9	protocadherin 9	Plasma Membrane	other
PCDHGA11	protocadherin gamma subfamily A, 11	Plasma Membrane	other
PCK1	phosphoenolpyruvate carboxykinase 1	Cytoplasm	kinase
PCSK6	proprotein convertase subtilisin/kexin type 6	Extracellular Space	peptidase
PEG10	paternally expressed 10	Nucleus	other
PEX14	peroxisomal biogenesis factor 14	Cytoplasm	transcription regulator
PFDN5	prefoldin subunit 5	Nucleus	transcription regulator
PI4K2A	phosphatidylinositol 4-kinase type 2 alpha	Cytoplasm	kinase
PIK3C2G	phosphatidylinositol-4-phosphate 3-kinase catalytic subunit type 2 gamma	Cytoplasm	kinase
PIK3CA	phosphatidylinositol-4,5-bisphosphate 3-kinase catalytic subunit alpha	Cytoplasm	kinase	SF 1126, PX-866, dactolisib, pictilisib, buparlisib, XL147, PKI-179, serabelisib, taselisib, AZD8835, PWT33597, BAY1082439, PQR309, GDC-0077
PKP2	plakophilin 2	Plasma Membrane	other
PPP1R7	protein phosphatase 1 regulatory subunit 7	Nucleus	phosphatase
PPP3R1	protein phosphatase 3 regulatory subunit B, alpha	Cytoplasm	phosphatase	cyclosporin A
PYGB	glycogen phosphorylase B	Cytoplasm	enzyme
RAB5C	RAB5C, member RAS oncogene family	Cytoplasm	enzyme
RAG1	recombination activating 1	Nucleus	enzyme
RBMS2	RNA binding motif single stranded interacting protein 2	Nucleus	other
RGS17	regulator of G protein signaling 17	Cytoplasm	other
RNASEH2A	ribonuclease H2 subunit A	Nucleus	enzyme
RPS5	ribosomal protein S5	Cytoplasm	other
RUFY3	RUN and FYVE domain containing 3	Plasma Membrane	other
S100A7	S100 calcium binding protein A7	Cytoplasm	other
SAR1B	secretion associated Ras related GTPase 1B	Cytoplasm	enzyme
SLC25A10	solute carrier family 25 member 10	Cytoplasm	transporter
SLC30A9	solute carrier family 30 member 9	Nucleus	transporter
SMPDL3B	sphingomyelin phosphodiesterase acid like 3B	Extracellular Space	enzyme
SPHAR	S-phase response (cyclin related)	Other	other
SPTLC1	serine palmitoyltransferase long chain base subunit 1	Cytoplasm	enzyme
STRN3	striatin 3	Nucleus	transcription regulator
STRN4	striatin 4	Cytoplasm	other
TASP1	taspase 1	Nucleus	peptidase
TMEM87A	transmembrane protein 87A	Cytoplasm	other
TRPM4	transient receptor potential cation channel subfamily M member 4	Plasma Membrane	ion channel
HAUS7	HAUS augmin like complex subunit 7	Cytoplasm	other
WWOX	WW domain containing oxidoreductase	Cytoplasm	enzyme
ZNF277	zinc finger protein 277	Nucleus	transcription regulator
ZNF480	zinc finger protein 480	Nucleus	transcription regulator
ABI1	abl interactor 1	Cytoplasm	other
ALOX5AP	arachidonate 5-lipoxygenase activating protein	Plasma Membrane	other
AMACR	alpha-methylacyl-CoA racemase	Cytoplasm	enzyme
APOC2	apolipoprotein C2	Extracellular Space	transporter
AQP1	aquaporin 1 (Colton blood group)	Plasma Membrane	transporter
AR	androgen receptor	Nucleus	ligand-dependent nuclear receptor	estradiol valerate/testosterone enanthate, estradiol cypionate/testosterone cypionate, BMS-641988, cyproterone acetate/ethinyl estradiol, enzalutamide, galeterone, ostarine, 1-testosterone, flutamide/goserelin, nandrolone phenpropionate, androgen receptor antagonist, apalutamide, darolutamide, AZD3514, APC-100, EPI-506, bicalutamide/leuprolide, bicalutamide/goserelin, dexamethasone/enzalutamide, …
SMG9	SMG9, nonsense mediated mRNA decay factor	Cytoplasm	other
TP53TG5	TP53 target 5	Nucleus	other
FAM208A	family with sequence similarity 208 member A	Nucleus	other
KIF25-AS1	KIF25 antisense RNA 1	Other	other
CA5B	carbonic anhydrase 5B	Cytoplasm	enzyme	methazolamide, hydrochlorothiazide, acetazolamide, trichloromethiazide, chlorothiazide, chlorthalidone, benzthiazide, sulfacetamide, topiramate
CBLC	Cbl proto-oncogene C	Nucleus	enzyme
MCUB	mitochondrial calcium uniporter dominant negative beta subunit	Cytoplasm	other
TRMT13	tRNA methyltransferase 13 homolog	Other	other
CFDP1	craniofacial development protein 1	Extracellular Space	other
CNOT2	CCR4-NOT transcription complex subunit 2	Nucleus	transcription regulator
COL16A1	collagen type XVI alpha 1 chain	Extracellular Space	other	collagenase clostridium histolyticum
CRYAA/CRYAA2	crystallin alpha A	Cytoplasm	other
DENND1A	DENN domain containing 1A	Plasma Membrane	other
DMC1	DNA meiotic recombinase 1	Nucleus	enzyme
DUSP10	dual specificity phosphatase 10	Nucleus	phosphatase
EFEMP2	EGF containing fibulin extracellular matrix protein 2	Extracellular Space	other
ENOPH1	enolase-phosphatase 1	Cytoplasm	enzyme
ENPP2	ectonucleotide pyrophosphatase/phosphodiesterase 2	Plasma Membrane	enzyme
EVL	Enah/Vasp-like	Plasma Membrane	other
FASLG	Fas ligand	Extracellular Space	cytokine	APG101
FBXO22	F-box protein 22	Cytoplasm	enzyme
FXN	frataxin	Cytoplasm	kinase
GABRA4	gamma-aminobutyric acid type A receptor alpha4 subunit	Plasma Membrane	ion channel	methohexital, primidone, meprobamate, aspirin/butalbital/caffeine, aspirin/meprobamate, aspirin/butalbital/caffeine/codeine, hexobarbital, pagoclone, alphadolone, SEP 174559, heptabarbital, nitrazepam, butobarbital, metyrapone/oxazepam, acetaminophen/butalbital/caffeine, sevoflurane, isoflurane, gaboxadol, isoniazid, dexamethasone/olanzapine, felbamate, etomidate, muscimol, halothane, fluoxetine/…
GDAP2	ganglioside induced differentiation associated protein 2	Cytoplasm	other
GJB5	gap junction protein beta 5	Plasma Membrane	transporter
GLUL	glutamate-ammonia ligase	Cytoplasm	enzyme
GPT	glutamic--pyruvic transaminase	Cytoplasm	enzyme
HLA-DMB	major histocompatibility complex, class II, DM beta	Plasma Membrane	transmembrane receptor
HMG20B	high mobility group 20B	Nucleus	transcription regulator
KCNK1	potassium two pore domain channel subfamily K member 1	Plasma Membrane	ion channel
LAMB1	laminin subunit beta 1	Extracellular Space	other
LAX1	lymphocyte transmembrane adaptor 1	Cytoplasm	other
LIG1	DNA ligase 1	Nucleus	enzyme
LPAR1	lysophosphatidic acid receptor 1	Plasma Membrane	G-protein coupled receptor
LRP4	LDL receptor related protein 4	Extracellular Space	other
LRPAP1	LDL receptor related protein associated protein 1	Plasma Membrane	other
MARK2	microtubule affinity regulating kinase 2	Cytoplasm	kinase
MMP16	matrix metallopeptidase 16	Extracellular Space	peptidase	marimastat
MPI	mannose phosphate isomerase	Cytoplasm	enzyme
MTMR11	myotubularin related protein 11	Cytoplasm	other
MTO1	mitochondrial tRNA translation optimization 1	Cytoplasm	enzyme
NUCB1	nucleobindin 1	Cytoplasm	other
OR10J1	olfactory receptor family 10 subfamily J member 1	Plasma Membrane	G-protein coupled receptor
PFKL	phosphofructokinase, liver type	Cytoplasm	kinase
PIAS3	protein inhibitor of activated STAT 3	Nucleus	transcription regulator
PLA2G3	phospholipase A2 group III	Extracellular Space	enzyme
PLG	plasminogen	Extracellular Space	peptidase	tenecteplase, PLAT, tranexamic acid, aprotinin, 6-aminocaproic acid, reteplase
POLR2H	RNA polymerase II subunit H	Nucleus	enzyme
PRKAG1	protein kinase AMP-activated non-catalytic subunit gamma 1	Nucleus	kinase
PTGS1	prostaglandin-endoperoxide synthase 1	Cytoplasm	enzyme	acetaminophen/pentazocine, acetaminophen/clemastine/pseudoephedrine, aspirin/butalbital/caffeine, acetaminophen/caffeine/dihydrocodeine, aspirin/hydrocodone, aspirin/oxycodone, acetaminophen/aspirin/caffeine, aspirin/pravastatin, acetaminophen/dexbrompheniramine/pseudoephedrine, aspirin/meprobamate, aspirin/caffeine/propoxyphene, aspirin/butalbital/caffeine/codeine, aspirin/caffeine/dihydrocodein…
PTPRN	protein tyrosine phosphatase, receptor type N	Plasma Membrane	phosphatase
RAB1A	RAB1A, member RAS oncogene family	Cytoplasm	enzyme
RGL2	ral guanine nucleotide dissociation stimulator like 2	Cytoplasm	other
RNF126	ring finger protein 126	Other	enzyme
RNF13	ring finger protein 13	Cytoplasm	enzyme
RPGRIP1	RPGR interacting protein 1	Extracellular Space	other
S100A12	S100 calcium binding protein A12	Cytoplasm	other
S100A8	S100 calcium binding protein A8	Cytoplasm	other
SH3GLB2	SH3 domain containing GRB2 like, endophilin B2	Cytoplasm	other
SLAMF7	SLAM family member 7	Plasma Membrane	other	elotuzumab
SLC38A2	solute carrier family 38 member 2	Plasma Membrane	transporter
SRBD1	S1 RNA binding domain 1	Other	other
STOML2	stomatin like 2	Plasma Membrane	other
SYNE2	spectrin repeat containing nuclear envelope protein 2	Nucleus	other
TAF7L	TATA-box binding protein associated factor 7 like	Nucleus	transcription regulator
TLR8	toll like receptor 8	Plasma Membrane	transmembrane receptor	VTX-2337, resiquimod, NKTR-262
TRHDE	thyrotropin releasing hormone degrading enzyme	Plasma Membrane	peptidase
TRIM28	tripartite motif containing 28	Nucleus	transcription regulator
TSPYL4	TSPY like 4	Nucleus	other
TYMP	thymidine phosphorylase	Extracellular Space	growth factor	tipiracil
UCKL1	uridine-cytidine kinase 1 like 1	Cytoplasm	kinase
UQCC1	ubiquinol-cytochrome c reductase complex assembly factor 1	Cytoplasm	other
ZFR2	zinc finger RNA binding protein 2	Other	other
ZNF467	zinc finger protein 467	Nucleus	transcription regulator
ACTR3B	ARP3 actin related protein 3 homolog B	Cytoplasm	other
ADCY3	adenylate cyclase 3	Plasma Membrane	enzyme
ADH6	alcohol dehydrogenase 6 (class V)	Cytoplasm	enzyme
ALDH3A2	aldehyde dehydrogenase 3 family member A2	Cytoplasm	enzyme
C2orf42	chromosome 2 open reading frame 42	Nucleus	other
CALY	calcyon neuron specific vesicular protein	Plasma Membrane	transmembrane receptor	trifluoperazine
CCHCR1	coiled-coil alpha-helical rod protein 1	Cytoplasm	other
CENPJ	centromere protein J	Nucleus	transcription regulator
CNTRL	centriolin	Nucleus	transcription regulator
CEP164	centrosomal protein 164	Cytoplasm	other
CETP	cholesteryl ester transfer protein	Extracellular Space	enzyme	torcetrapib
CIC	capicua transcriptional repressor	Nucleus	transcription regulator
CIRBP	cold inducible RNA binding protein	Nucleus	translation regulator
CLASP2	cytoplasmic linker associated protein 2	Cytoplasm	other
CLDN7	claudin 7	Plasma Membrane	other
CLIP1	CAP-Gly domain containing linker protein 1	Cytoplasm	other
CTRL	chymotrypsin like	Extracellular Space	peptidase
DDX39A	DExD-box helicase 39A	Nucleus	enzyme
DLST	dihydrolipoamide S-succinyltransferase	Cytoplasm	enzyme
DNA2	DNA replication helicase/nuclease 2	Cytoplasm	enzyme
FBLN2	fibulin 2	Extracellular Space	other
FCGRT	Fc fragment of IgG receptor and transporter	Plasma Membrane	transmembrane receptor
FRAT2	FRAT2, WNT signaling pathway regulator	Cytoplasm	other
GFRA3	GDNF family receptor alpha 3	Plasma Membrane	transmembrane receptor
GPKOW	G-patch domain and KOW motifs	Nucleus	other
HDAC2	histone deacetylase 2	Nucleus	transcription regulator	tributyrin, belinostat, pyroxamide, histone deacetylase class II inhibitors, bortezomib/vorinostat, chidamide, 4SC-202, vorinostat, trametinib/vorinostat, theophylline
HIST1H1E	histone cluster 1 H1 family member e	Nucleus	other
HOXC6	homeobox C6	Nucleus	transcription regulator
HTR1A	5-hydroxytryptamine receptor 1A	Plasma Membrane	G-protein coupled receptor	buspirone, caffeine/ergotamine, bifeprunox, iloperidone, flibanserin, asenapine, naluzotan, psilocybine, SLV-314, cariprazine, naproxen/sumatriptan, thioproperazine, lurasidone, vortioxetine, brexpiprazole, cinitapride, pipothiazine, chloropromazine, vilazodone, trazodone, sumatriptan, doxepin, alprenolol, eletriptan, almotriptan, fenfluramine, quetiapine, nefazodone, xaliproden, ziprasidone, ari…
IDH3B	isocitrate dehydrogenase 3 (NAD(+)) beta	Cytoplasm	enzyme
KDM3B	lysine demethylase 3B	Nucleus	enzyme
KATNA1	katanin catalytic subunit A1	Cytoplasm	enzyme
KCNJ2	potassium voltage-gated channel subfamily J member 2	Plasma Membrane	ion channel	nicorandil, amiodarone
KIR3DL3	killer cell immunoglobulin like receptor, three Ig domains and long cytoplasmic tail 3	Other	other
KLK15	kallikrein related peptidase 15	Extracellular Space	peptidase
KRT33A	keratin 33A	Extracellular Space	other
KRTAP5-9	keratin associated protein 5-9	Cytoplasm	other
LGALS1	galectin 1	Extracellular Space	other	OTX008
LILRB5	leukocyte immunoglobulin like receptor B5	Plasma Membrane	transmembrane receptor
LMAN2	lectin, mannose binding 2	Cytoplasm	transporter
MAGED2	MAGE family member D2	Plasma Membrane	other
MEF2C	myocyte enhancer factor 2C	Nucleus	transcription regulator
MEPE	matrix extracellular phosphoglycoprotein	Extracellular Space	other
MEST	mesoderm specific transcript	Cytoplasm	peptidase
OR7A5	olfactory receptor family 7 subfamily A member 5	Plasma Membrane	G-protein coupled receptor
PCDHB13	protocadherin beta 13	Extracellular Space	other
PDXDC1	pyridoxal dependent decarboxylase domain containing 1	Cytoplasm	other
PELI2	pellino E3 ubiquitin protein ligase family member 2	Cytoplasm	kinase
PGM5	phosphoglucomutase 5	Cytoplasm	enzyme
PIK3R1	phosphoinositide-3-kinase regulatory subunit 1	Cytoplasm	kinase
PPEF1	protein phosphatase with EF-hand domain 1	Extracellular Space	phosphatase
PPP5C	protein phosphatase 5 catalytic subunit	Nucleus	phosphatase
PRDM9	PR/SET domain 9	Nucleus	enzyme
PSD3	pleckstrin and Sec7 domain containing 3	Cytoplasm	other
RASGRP2	RAS guanyl releasing protein 2	Cytoplasm	other
RMND1	required for meiotic nuclear division 1 homolog	Cytoplasm	other
RUSC1	RUN and SH3 domain containing 1	Cytoplasm	other
SEC23B	Sec23 homolog B, coat complex II component	Extracellular Space	transporter
SMG5	SMG5, nonsense mediated mRNA decay factor	Nucleus	other
SNRK	SNF related kinase	Cytoplasm	kinase
STAG1	stromal antigen 1	Nucleus	transcription regulator
TBC1D8	TBC1 domain family member 8	Plasma Membrane	other
THNSL2	threonine synthase like 2	Other	other
TMED9	transmembrane p24 trafficking protein 9	Cytoplasm	transporter
TOB1	transducer of ERBB2, 1	Nucleus	transcription regulator
TRIM68	tripartite motif containing 68	Cytoplasm	enzyme
ZNF471	zinc finger protein 471	Nucleus	transcription regulator
AAMP	angio associated migratory cell protein	Plasma Membrane	other
ABCD1	ATP binding cassette subfamily D member 1	Plasma Membrane	transporter
AGPAT4	1-acylglycerol-3-phosphate O-acyltransferase 4	Cytoplasm	enzyme
AGTPBP1	ATP/GTP binding protein 1	Nucleus	peptidase
AKAP8L	A-kinase anchoring protein 8 like	Nucleus	other
AMDHD2	amidohydrolase domain containing 2	Nucleus	enzyme
APOA1	apolipoprotein A1	Extracellular Space	transporter	ISIS 681257
APPBP2	amyloid beta precursor protein binding protein 2	Cytoplasm	other
ARHGAP4	Rho GTPase activating protein 4	Cytoplasm	other
CASS4	Cas scaffold protein family member 4	Plasma Membrane	other
CHM	CHM, Rab escort protein 1	Cytoplasm	enzyme
CLDN11	claudin 11	Plasma Membrane	other
CYP26A1	cytochrome P450 family 26 subfamily A member 1	Cytoplasm	enzyme
DBI	diazepam binding inhibitor, acyl-CoA binding protein	Cytoplasm	other
DKK3	dickkopf WNT signaling pathway inhibitor 3	Extracellular Space	cytokine
NIPSNAP2	nipsnap homolog 2	Plasma Membrane	other
GLB1	galactosidase beta 1	Cytoplasm	enzyme
HBG2	hemoglobin subunit gamma 2	Cytoplasm	other
HPCA	hippocalcin	Cytoplasm	other
HPSE	heparanase	Plasma Membrane	enzyme	2-O,3-O-desulfated heparin, PG 545, roneparstat, heparanase inhibitor PI-88
IRF2BP1	interferon regulatory factor 2 binding protein 1	Nucleus	transcription regulator
KIF5A	kinesin family member 5A	Cytoplasm	transporter
KLRF1	killer cell lectin like receptor F1	Plasma Membrane	transmembrane receptor
LPCAT3	lysophosphatidylcholine acyltransferase 3	Plasma Membrane	enzyme
DNAAF1	dynein axonemal assembly factor 1	Cytoplasm	other
MAG	myelin associated glycoprotein	Plasma Membrane	other
MAGEA1	MAGE family member A1	Plasma Membrane	other
MAGEA8	MAGE family member A8	Other	other
MAOA	monoamine oxidase A	Cytoplasm	enzyme	ladostigil, CX-1370, moclobemide, MAO-A inhibitor, phentermine/topiramate, fenfluramine/phentermine, methamphetamine, dextroamphetamine, procainamide, tranylcypromine, phenelzine, iproniazid, isocarboxazid, phentermine, benzphetamine, N-(2-indanyl)glycinamide
MAZ	MYC associated zinc finger protein	Nucleus	transcription regulator
MGRN1	mahogunin ring finger 1	Cytoplasm	enzyme
MKRN1	makorin ring finger protein 1	Cytoplasm	enzyme
MKS1	Meckel syndrome, type 1	Cytoplasm	other
MLF1	myeloid leukemia factor 1	Nucleus	other
MRPS12	mitochondrial ribosomal protein S12	Cytoplasm	other
NCF4	neutrophil cytosolic factor 4	Cytoplasm	enzyme
NDUFA10	NADH:ubiquinone oxidoreductase subunit A10	Cytoplasm	transporter
NT5E	5'-nucleotidase ecto	Plasma Membrane	phosphatase	MEDI9447, CPI-006
NUBP2	nucleotide binding protein 2	Nucleus	other
OS9	OS9, endoplasmic reticulum lectin	Nucleus	other
PAF1	PAF1 homolog, Paf1/RNA polymerase II complex component	Nucleus	other
PHACTR1	phosphatase and actin regulator 1	Cytoplasm	other
PMPCA	peptidase, mitochondrial processing alpha subunit	Cytoplasm	peptidase
POLG	DNA polymerase gamma, catalytic subunit	Cytoplasm	enzyme	lamivudine/nelfinavir/stavudine, lamivudine/stavudine, lamivudine/nevirapine/stavudine, stavudine, vidarabine, zalcitabine
PPP2R2A	protein phosphatase 2 regulatory subunit Balpha	Cytoplasm	phosphatase
NPY4R/NPY4R2	neuropeptide Y receptor Y4	Plasma Membrane	G-protein coupled receptor
PRKG2	protein kinase cGMP-dependent 2	Cytoplasm	kinase
PRM1	protamine 1	Nucleus	other
PRSS23	serine protease 23	Extracellular Space	peptidase
PSMB10	proteasome subunit beta 10	Cytoplasm	peptidase	carfilzomib, carfilzomib/dexamethasone/lenalidomide, carfilzomib/dexamethasone/rituximab, carfilzomib/dexamethasone
RNASEL	ribonuclease L	Cytoplasm	enzyme
RYBP	RING1 and YY1 binding protein	Nucleus	transcription regulator
SENP5	SUMO specific peptidase 5	Nucleus	peptidase
SESN1	sestrin 1	Nucleus	other
SLC35C1	solute carrier family 35 member C1	Cytoplasm	transporter
SLC6A16	solute carrier family 6 member 16	Plasma Membrane	transporter
SOX30	SRY-box 30	Nucleus	transcription regulator
TPX2	TPX2, microtubule nucleation factor	Nucleus	other
TYW1	tRNA-yW synthesizing protein 1 homolog	Other	other
YARS2	tyrosyl-tRNA synthetase 2	Cytoplasm	enzyme
ZNF280D	zinc finger protein 280D	Other	other
ZNF358	zinc finger protein 358	Nucleus	transcription regulator
